# Supplementary material for: A Hyaluronic Acid Demilune Scaffold and Polypyrrole-Coated Fibers Carrying Embedded Human Neural Precursor Cells and Curcumin for Surface Capping of Spinal Cord Injuries
Source: MDPI journal article supplement (doi:10.3390/biomedicines9121928), 2021-12-16
Supplement: s1 [file s1]

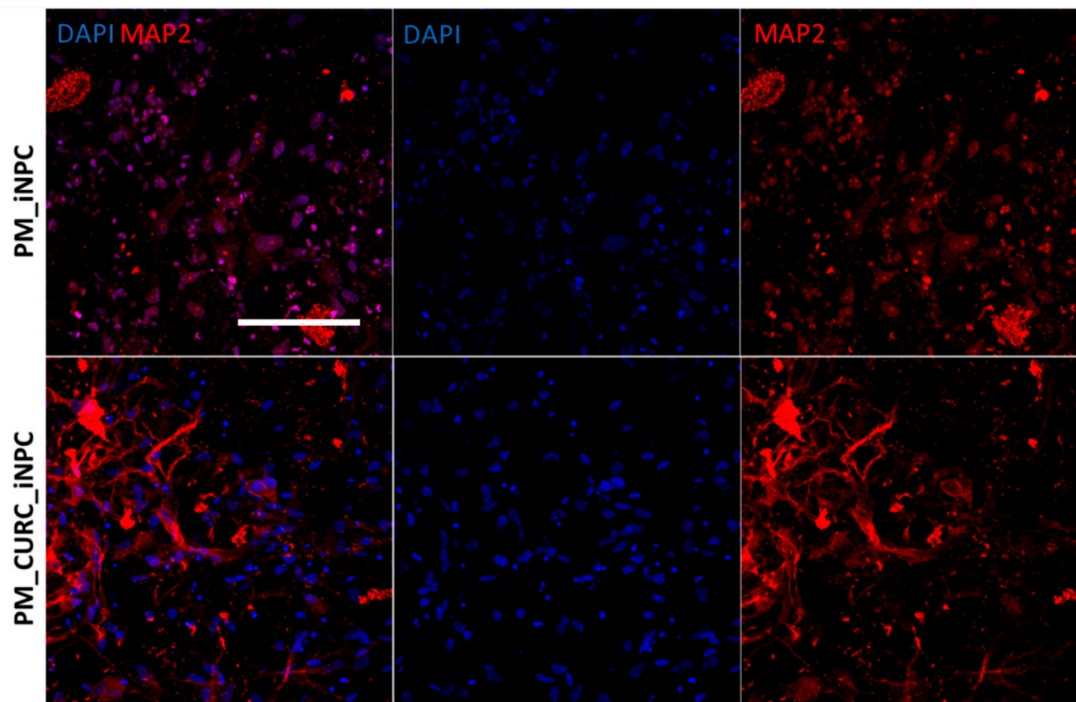

**Figure S1. MAP2 positive staining for evaluation of neuronal maturation rates in iNPC-PM embedded with or without CURC.** Confocal immunofluorescence images for MAP2 (RED) iNPC embedded into PM 0.15% (upper panels) or PM 0.15% mixed with CURC 5  $\mu$ M (lower panels). Nuclei were stained with DAPI (blue). Scale bars: 100  $\mu$ m.
